# Supplementary material
Source: Springer Nature journal article supplement (https://www.springermedizin.de/resource/supplementary/13031_2010_46_MOESM1_ESM.pdf/9645022)

No. of cases

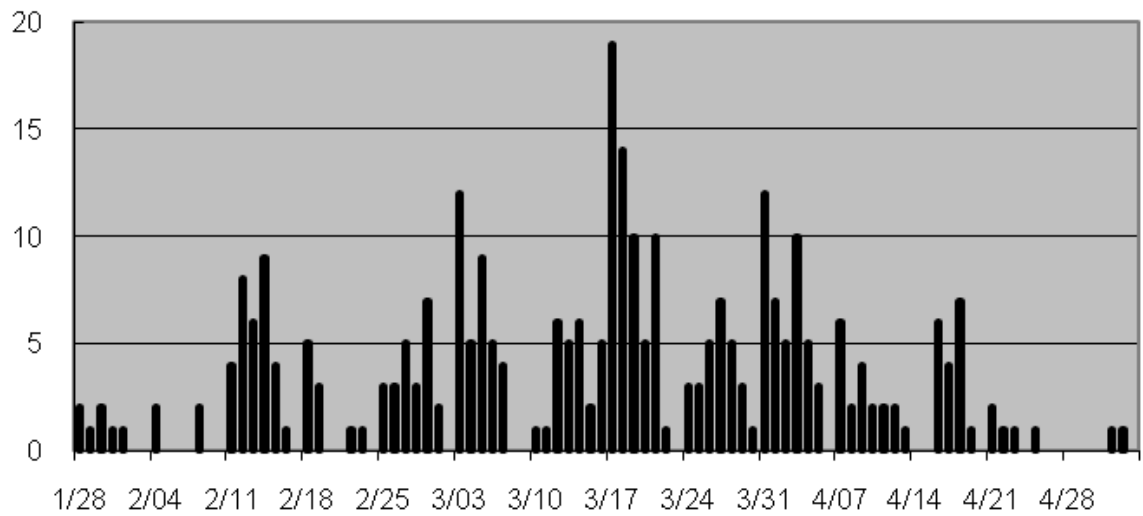

Date by week

Supplement: MOESM1 [file 9645022]
